# Supplementary material
Source: Springer Nature journal article supplement (https://www.springermedizin.de/resource/supplementary/13054_2011_9741_MOESM2_ESM.pdf/9706672)

**A****MODES OF MECHANICAL VENTILATION USED IN ALL PATIENTS**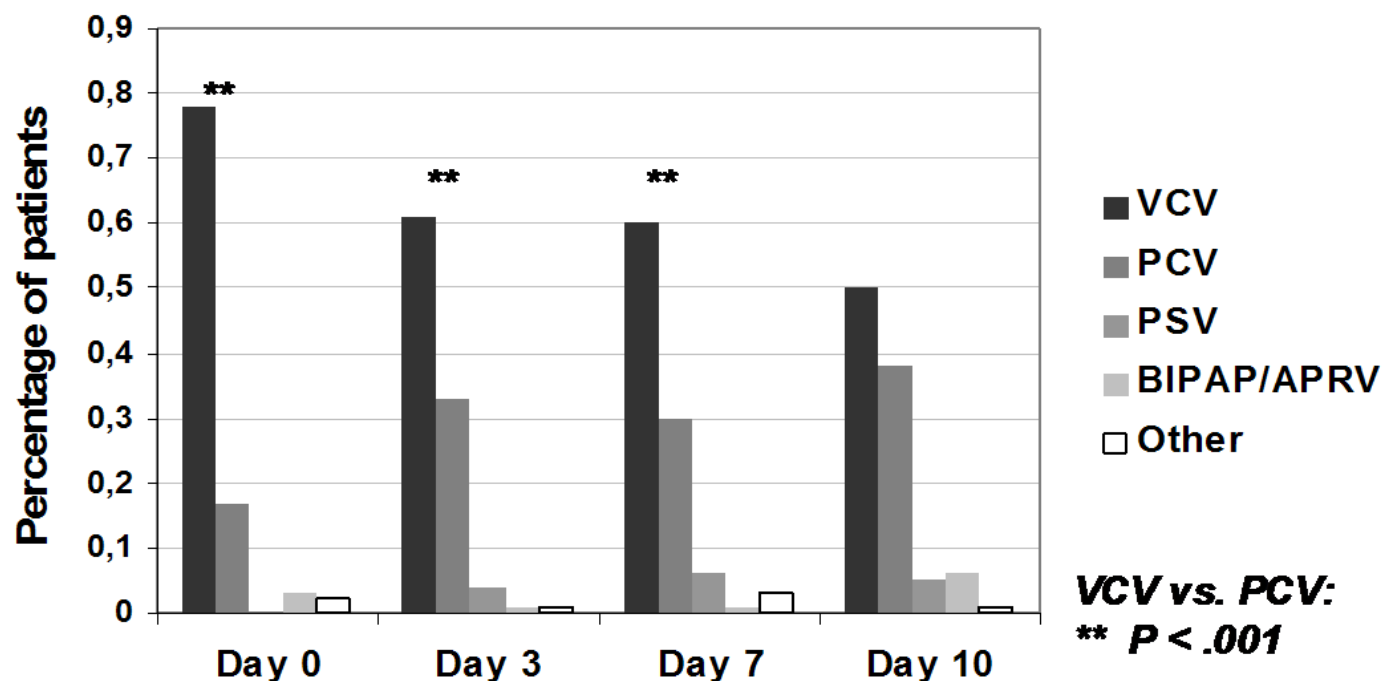**B****USE OF ADJUVANTS OF MECHANICAL VENTILATION IN ALL PATIENTS**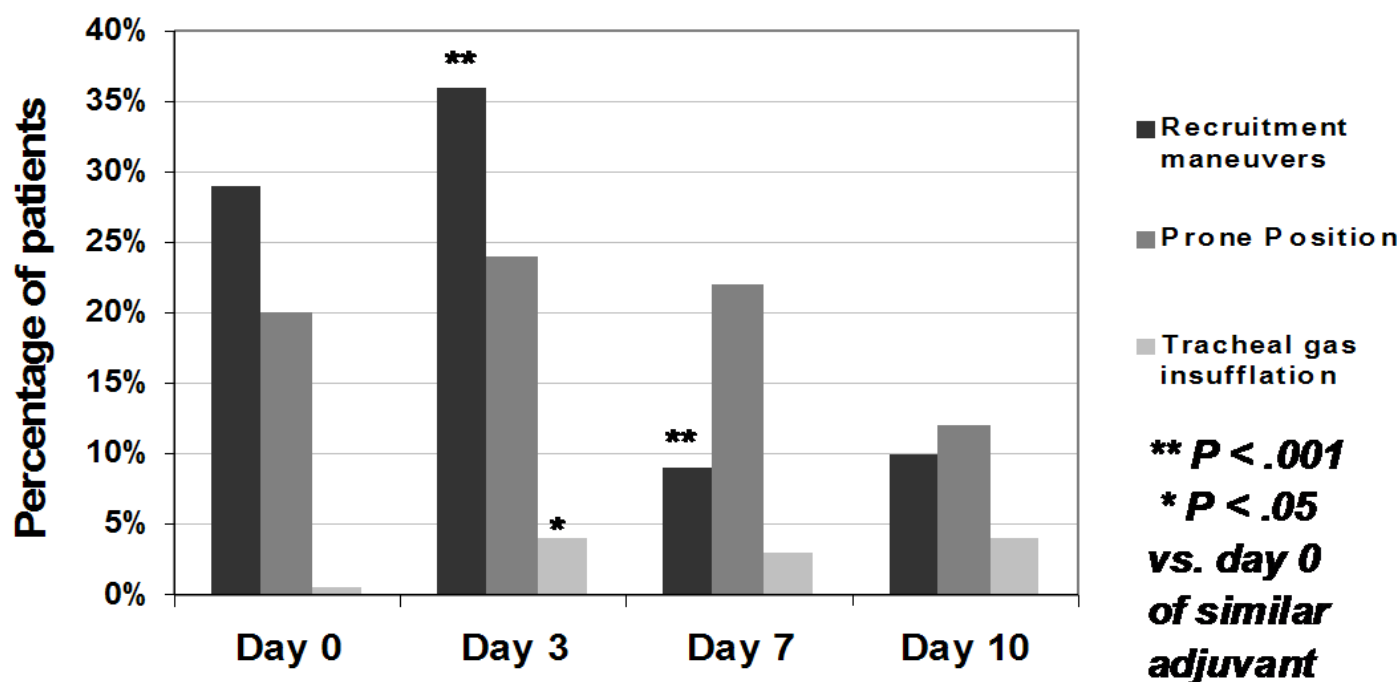

Supplement: MOESM2 [file 9706672]
